# Supplementary material for: Rapid and Sensitive Determination of Lipid Oxidation Using the Reagent Kit Based on Spectrophotometry (FOODLABfatSystem)
Source: Hindawi journal article supplement (doi:10.1155/2016/1468743), 2016-01-01
Supplement: f1 [file 1468743.f1.docx]

This document file contains supplementary data (S1-S3).

Table S1.Fatty acid composition (%) in canola, olive, palm, and soybean oils

Values were described in detail by Dubois et al. (2007); SFA, saturated fatty acids; MUFA, mono unsaturated fatty acids; PUFA, poly unsaturated fatty acids

| Fatty acid | Common name | Edible oils | | | |
| --- | --- | --- | --- | --- | --- |
| Canola | Olive | Palm | Soybean |
| Total saturated fatty acids | | 8.0 | 15.3 | 50.4 | 15.7 |
| C8:0 | Caprylic acid | - | - | 0.1 | - |
| C10:0 | Capric acid | - | - | 0.1 | - |
| C12:0 | Lauric acid | - | - | 0.4 | - |
| C14:0 | Myristic acid | 0.1 | 0.0 | 1.1 | 0.1 |
| C16:0 | Palmitic acid | 5.1 | 12.1 | 43.8 | 10.8 |
| C18:0 | Stearic acid | 1.7 | 2.6 | 4.4 | 3.9 |
| C20:0 | Arachidic acid | 0.6 | 0.4 | 0.3 | 0.3 |
| C22:0 | Behenic acid | 0.3 | 0.1 | 0.1 | 0.2 |
| C24:0 | Lignoceric acid | 0.2 | 0.1 | 0.1 | 0.3 |
| Total mono unsaturated fatty acids | | 62.4 | 73.6 | 39.4 | 24.2 |
| C16:1n-7 | Palmitoleic acid | 0.2 | 0.8 | 0.2 | 0.2 |
| C18:1n-9 | Oleic acid | 60.1 | 72.5 | 39.1 | 23.9 |
| C20:1n-9 | Gadoleic acid | 1.4 | 0.3 | 0.1 | 0.1 |
| C22:1n-9 | Erucic acid | 0.4 | - | - | - |
| C24:1n-9 | Nervonic acid | 0.3 | - | - | - |
| Total poly unsaturated fatty acids | | 31.5 | 10.0 | 10.5 | 59.8 |
| C18:2n-6 | Linoleic acid | 21.5 | 9.4 | 10.2 | 52.1 |
| C18:3n-3 | α-Linolenic acid | 9.9 | 0.6 | 0.3 | 7.8 |
| C20:2n-6 | Eicosadienoic acid | 0.1 | - | - | - |

Figure S2. Time courses of AVs of commercialized edible oils during the thermally induced oxidation at 180°C.

Figure S3. Time courses of POVs of commercialized edible oils during the thermally induced oxidation at 180°C.
